# Supplementary material for: Orange fluorescent proteins constructed from cyanobacteriochromes chromophorylated with phycoerythrobilin
Source: Royal Society of Chemistry journal article supplement (doi:10.1039/c3pp50411e), 2014-02-11
Supplement: c3pp50411e1.pdf [file c3pp50411e1.pdf]

**Orange fluorescent proteins shift constructed from cyanobacteriochromes  
chromophorylated with phycoerythrobilin**

Ya-Fang Sun<sup>1</sup>, Jin-Guo Xu<sup>1</sup>, Kun Tang<sup>1</sup>, Dan Miao<sup>1</sup>, Wolfgang Gärtner<sup>2</sup>, Hugo Scheer<sup>3</sup>,  
Kai-Hong Zhao<sup>1</sup> Ming Zhou<sup>1,\*</sup>

1) State Key Laboratory of Agricultural Microbiology, Huazhong Agricultural University,  
Wuhan 430070, P.R. China; 2) Max-Planck-Institute for Chemical Energy Conversion,  
Stiftstrasse 34 – 36, D - 45470 Mülheim an der Ruhr, Germany; 3) Department Biologie I,  
Universität München, Menzinger Str. 67, D-80638 München, Germany

**Supplementary Material**

(2 tables, 7 figures)

**Table S1: Primers for GAFs and its fusion with affinity tags or *ho1* and *pebS*.**

| Primer | Sequence                                | DNA                 |
|--------|-----------------------------------------|---------------------|
| P1     | 5'-CCCGGATCCCAATCGCTGAATCTACAAAAT-3'    | <i>all1280 gaf2</i> |
| P2     | 5'-GGCGTCGACTTACAATTCATTCTGGGCTTG-3'    |                     |
| P3     | 5'-CGCGATATCATCTTGTTAATGTTGTT-3'        | <i>all3691 gaf2</i> |
| P4     | 5'-ATTAAGCTTTTATTTTTGCGTTTGGAT-3'       |                     |
| P5     | 5'-GCCGGATCCCAGCAATATCAACACACTTTAC-3'   | <i>alr2279</i>      |
| P6     | 5'-TTAGTCGACGGCTTGCCTAGTTTCCTGAGC-3'    |                     |
| P7     | 5'-ATAGGATCCATGCAAATTCATTCTCACGCAG-3'   | <i>alr3356</i>      |
| P8     | 5'-GCAAGCTTCTCAACTTTCCAAAATATAAGGCGA-3' |                     |
| P9     | 5'-TCTGGATCCACTCAAGCTGAACTC-3'          | <i>tlr0911</i>      |
| P10    | 5'-ATAGTCGACTTATTCCTGATGTAGCGC-3'       |                     |
| P11    | 5'-GCGGAATTCGAGTCTTTGGATTTAGAAAC-3'     | <i>alr5272 gaf1</i> |
| P12    | 5'-CTGGTCGACTTTCGTATTTTGAATGGCTA-3'     |                     |
| P13    | 5'-CTAGGATCCTCAGACAAATTTCAAGCA-3'       | <i>alr5272 gaf2</i> |
| P14    | 5'-GCCAAGCTTTAATTTTTTCAGTCGTG-3'        |                     |
| P15    | 5'-CCAGGATCCGATACACCACCAGAAGAAGA-3'     | <i>all1280 gaf1</i> |
| P16    | 5'-TATGTCGACTCTGATGACTTGACGCGCTAA-3'    |                     |
| P17    | 5'-CCGGAATTCTTTGCCTCTATCTT-3'           | <i>all3691 gaf1</i> |
| P18    | 5'-CTGCTCGAGTTATGTTTGAGATTCTT-3'        |                     |
| P19    | 5'-CCCGGATCCTCTCTAAGTTTACAAACCATT-3'    | <i>alr3120 gaf1</i> |
| P20    | 5'-AATGTCGACTAACTGATCCTGCAATTTTTGG-3'   |                     |
| P21    | 5'-CGTGAATTCCAACAGGTAGAAAGGGAGA-3'      | <i>alr3120 gaf2</i> |
| P22    | 5'-TTTGTGCGACTCTTTCGGCAAGTTCTTG-3'      |                     |
| P23    | 5'-TCACAAGCTTATCAAGGTAATTTAAAAACAG-3'   | <i>all0729 gaf1</i> |
| P24    | 5'-TAGCTCGAGTTATTCTAAGGCTAAGGACAC-3'    |                     |
| P25    | 5'-TAAGATATCAAGCAAGCCGAAGCGGAAAGC-3'    | <i>all0729 gaf2</i> |
| P26    | 5'-GGGGTCGACTCATTGTAAACGTTCTTCGCT-3'    |                     |

|     |                                                  |                                |
|-----|--------------------------------------------------|--------------------------------|
| P27 | 5'-CACGGATCCACCCTAGATTTAGATACC-3'                |                                |
| P28 | 5'-CCCGTCGACCTAAACTTCTAACTGATT-3'                | <i>all0729 gaf3</i>            |
| P29 | 5'-AAAGAATTCAAAAGTCGGCAACAGCAACA-3'              |                                |
| P30 | 5'-CGCCTCGAGCTATTGTAGTTCCGTCTGTAT-3'             | <i>all2239</i>                 |
| P31 | 5'-ATAGGATCCCGGATTCGTCAATCCTTGGAG-3'             |                                |
| P32 | 5'-CGCCTCGAGTTAGATCGCTACTGCAAGTTG-3'             | <i>GCN4-tag::all2699 gaf1</i>  |
| P33 | 5'-GCCGGTACCCAATCGCTGAATCTACAAAATATTCTCAATGCC-3' |                                |
| P34 | 5'-CTAGAATTCTCCAGAACCACCAGATCCCGCTAAGGCACTTCT-3' | <i>all1280 gaf2::ho1::pebS</i> |
| P35 | 5'-GCGGGTACCTTGGAGTTGGAGGATATTATCACAGCGACAA-3'   |                                |
| P36 | 5'-CAAGAATTCACCAGATCCACCTGATCCAATGATGGCTTCTTT-3' | <i>all2699 gaf1::ho1::pebS</i> |

---

**Table S2: Plasmids used.** The pACYCDuet and pET30 (or pET28), from Novagen, are T7 promoter expression vectors. pACYCDuet are designed to co-express two target proteins in *E. coli*. Using the two vector-derivatives together with compatible replicons and antibiotic resistance, 3 proteins could be co-expressed in the same cell, thereby generating the respective designed biliproteins in *E. coli*. Subscripts indicate the strain of the parent organisms. a) *pebS* was synthesized according to the related gene sequence of *Prochlorococcus* phage P-SSM2 <sup>1</sup>. The “-” in “ho1<sub>PCC7120</sub>-pebS” denotes that the two genes (*ho1* and *pebS*) were inserted respectively at the two cloning sites of pACYCDuet. The “::” in “ho1<sub>PCC7120</sub>::pebS” denotes that the two genes were fused into one DNA segment.

| Antibiotic resistance | Plasmids with P15A replicon | Plasmids with ColE1 replicon                                     |
|-----------------------|-----------------------------|------------------------------------------------------------------|
|                       | pACYCDuet derivatives       | pET30 derivatives                                                |
| Kanamycin             |                             | pET-all1280 <i>gaf2</i> <sub>PCC7120</sub>                       |
|                       |                             | pET-all2699 <i>gaf1</i> <sub>PCC7120</sub>                       |
|                       |                             | pET-all2699 <i>gaf3</i> <sub>PCC7120</sub>                       |
|                       |                             | pET-all3691 <i>gaf2</i> <sub>PCC7120</sub>                       |
|                       |                             | pET-alr2279 <sub>PCC7120</sub>                                   |
|                       |                             | pET-alr3356 <sub>PCC7120</sub>                                   |
|                       |                             | pET-slr1393 <i>gaf3</i> <sub>PCC6803</sub>                       |
|                       |                             | pET-tlr0911 <sub><i>Thermosynechococcus elongatus</i> BP-1</sub> |
|                       |                             | pET-all1280 <i>gaf1</i> <sub>PCC7120</sub>                       |
|                       |                             | pET-all3691 <i>gaf1</i> <sub>PCC7120</sub>                       |
|                       |                             | pET-all0729 <i>gaf1</i> <sub>PCC7120</sub>                       |
|                       |                             | pET-all0729 <i>gaf2</i> <sub>PCC7120</sub>                       |
|                       |                             | pET-all0729 <i>gaf3</i> <sub>PCC7120</sub>                       |
|                       |                             | pET-all2239 <sub>PCC7120</sub>                                   |
|                       |                             | pET-alr5272 <i>gaf1</i> <sub>PCC7120</sub>                       |
|                       |                             | pET-alr5272 <i>gaf2</i> <sub>PCC7120</sub>                       |

|                 |                                                                       |                                                                                                                                                                                                                                                                                                                                                                                                                                        |
|-----------------|-----------------------------------------------------------------------|----------------------------------------------------------------------------------------------------------------------------------------------------------------------------------------------------------------------------------------------------------------------------------------------------------------------------------------------------------------------------------------------------------------------------------------|
|                 |                                                                       | <p>pET-<i>alr3120</i> <i>gaf1</i><sub>PCC7120</sub></p> <p>pET-<i>alr3120</i> <i>gaf2</i><sub>PCC7120</sub></p> <p>pET28-GCN4-tag::<i>all2699</i> <i>gaf1</i><sub>PCC7120</sub></p> <p>pET-<i>all1280</i> <i>gaf2</i><sub>PCC7120</sub>::<i>ho1</i>::<i>pebS</i></p> <p>pET-<i>all2699</i> <i>gaf1</i><sub>PCC7120</sub>::<i>ho1</i>::<i>pebS</i></p> <p>pET-<i>slr1393</i> <i>gaf3</i><sub>PCC6803</sub>::<i>ho1</i>::<i>pebS</i></p> |
| Chloramphenicol | pACYC- <i>ho1</i> <sub>PCC7120</sub> - <i>pcyA</i> <sub>PCC7120</sub> |                                                                                                                                                                                                                                                                                                                                                                                                                                        |
| Chloramphenicol | pACYC- <i>ho1</i> <sub>PCC7120</sub> - <i>pebS</i> <sup>a</sup>       |                                                                                                                                                                                                                                                                                                                                                                                                                                        |
| Streptomycin    | pCDF- <i>ho1</i> <sub>PCC7120</sub> :: <i>pebS</i> <sup>a</sup>       |                                                                                                                                                                                                                                                                                                                                                                                                                                        |

## A

### All10729(1645aa), two-component hybrid sensor and regulator

QSLNSQSLVSSNNKITRSKNNTQEQYQINAVKLYKHNLVLTCLAKNQVLYQGNLKTALAEI→240  
TNVAAHNLGIERASIWLYDETLTKIQCADLFEYSRNQHSAGLSLSAKEYPTYFQALHQDE→300  
AIAVDDAYTDPRTKEFAQSYLTPLNITAMLDTPIRLAGKTVGVLCLEAVKLPHHWTPEDQ→360  
NFARSLTNLVSLALEARERQRAEAAHRISEQKLASAFRASPDPIALCTYPETRYIEVND→420  
FCRLFGYSRSQVIGNTDKELNIWVNLEECHFLSQILEKAKAIRNHEVDFRTSNGEIKTTL→480  
FSAEMIEIDGQKYILGTAKDITERKQAEAESRLLLTTQAIARAVDVKSALTTLVRVICQ→540  
TIGWDFGEAWTPNRESHVLEHSLVCYCEEASLEEFCHQSQNLRIAPGEGLPGRVWQTKQS→600  
EWIEDVSLVKQGQFLRSPQAQKVGKAGFGIPIIAGKEVLAVLIFFKRSSIPVDKRLML→660  
LGAVATQLGSLIERKLIESAHRNSEERLQLALEASDLGLWDWNITTKGIYRDWQWQKMLG→720  
YTQEDIEDDERVIEQLLHPEDLATVKSAITAHLQGVTPVYEMEFRMCAAGGWKVVQSRG→780  
QIVERNEQGQPLRMTGTTKDITERKILEKELELREARLNAFFSGAPVGMSSILDNQLRFVQ→840  
INELIAHIHGKPAQEHIGKTLLEIAPRIAPLVTPCQKVLLTGQPIILNVELSLPAVNQAD→900  
SLRHFLVSYFPIPGEGNQLSGVGKIVVEISDVYDELRLRKRAEEALKESIERERAIQVI→960  
QRMRQTLDDLDTIFAATTEELRQVLNCDRAVVYRFDSQSGGEFVAESWGKGWISLIEKQKN→1020  
VPHLTENTAKDQSCAKLLEYTPQATPKNFCLVADIYQAGFGSCYIEFLERLQAKAYII→1080  
VPILSGDQVWGLLATYQNSGPRQWKTGEINIVIQIGNQLEVALQQAQLLTQTQRQSQALE→1140

### All1280(941 aa), annotated as two-component sensor histidine kinase

MQHIINFSSNKAIMLFNDESSRLETLYQYRIIDTPPEEEFDDLVLNLAADSCNTPIALIS→60  
ILDAQREWFKSKVGI TELEIPRNICGIHTIGQNDILIPDTPWQDERFVENPLVRQKPTA→120  
FRFYAGVPLINSEGFALGCLAVIDSTPRNLSLKEQRILKRLARQVIRQLELHRKQISHES→180  
SLYVHLLFTNNPRPIWICERRTLQILDVNQAAITQYGYRAEFLEMQLAQVVFPEFISDL→240  
IRDIEQENFQFPFLMECQHRLSSGQVIDVELAINYIEHSGYKACLVDAINITEHIQIERN→300  
LQKSETRVRTILEAIPVPLVISRVDDGLILYTNSEFLQTFQLSGNDLINHYAADLYENPE→360  
DRQQILEALSQHGSLQNYDIQFKKSDGTSFWAIASIQYLNFNNEYAILTVLYDITERKNI→420  
EAKLQEKNALQSIFTGIPLMIALISPEGQIQWVNQELDRLLGWSLRDYQTLDFIAELYP→480  
QPEYRQLVINFIQSGECIWCDFRTQTRYQVLDTSWINIKLADGRIIGIGQEITKRKQTE→540  
RALKGQVEREQLMRAVAQRIRQSLNLQNILNATVKEIKDLLDVRVVVYQFAPDMSGKIV→600  
AESVKPGWKIALGADIQDNCFOSGAGADYROGHKRAIANIYTAELTDCHLRLLEQFOVKA→660  
NLVVPILLEVSEGNTVPQLWGLLIAHOCSTPRDWEAHELDLLDQLSVPIAIAIQSSILQ→720  
QAQNELAERQKVEVRLRSALAEKEVLLKEVHHRVKNNLQIVSGLLLLHSQTLKDPPELIRT→780

### All12239(1707 aa), annotated as two-component hybrid sensor and regulator

QSTIHYAVERMLLTRQLEKSRQQQQLMVAIALIIRQSLKLEDILSVTVAEVRQFLOADR→180  
LTIYQFQPDMSGIVVAESILPGWIATKGAQIEDKCFQDSAGHNHQLKKRAINDIYQAGLTN→240  
CYLELLEQFOVKATLIVPIMVTNKSGLLIAHOCAPHHWQSFELDLLEQLAVQIAIAIQ→300  
QASAYEQIQTELQERKRVEATLRESEQRFRQMADTAPVLIWMSGLDKLCYYFNKTWLDFT→360

### All12699(920aa), two-component sensor histidine kinase

MSPTAKPNSQVSLNQESVLRRTARIRQSLELEDIITATTAEVRALLGTDRVMIYKFHPD→60  
 GSGQVIAESIYENRPLSLGLNFPADDIPPOARELLVKSIVDVATGMIGOSPVHDL→120  
 ETGELISEDICYRPVDSCHVEYLTAMGVKSSVVAPIFCODELWGLLVSHHSENRTVSEDE→180  
 LEAMQMIVDQLAVAIAQSHLLTQARKKAQKEAIINRIITLLHSLPTIVLKPAAEAVGAF→240  
 AGVGGRLCLRNQAVESQHVLRSLAECLIPGNSCVQLYTCGQQPITPEQTIYPLIEQYRV→300  
 WQEHYTSHHDIWAIADIYQDSTLRSLQAVFQPTKIRGILIIIPLEYRQQLLGYLSIFRNEI→360  
 DTETLWAGRIDQDQRQMFPRVSNLWRDAKKSQAQEWTSSEEIELAKEIGQHFASAIQQYE→420  
 LYQQVQAFNENLEKQVQKRTLELRHTSEQQQAVFGVISKIR~~ESLDTNTIFQITTK~~EACOL→480  
 IKADRVSVYRFDNEWGGEFVGDFEATSPHWSNESKISINTVWNDTYLONTQGGRYRYNET→540  
 FAVDDIYKVGFTQCHVENLEQFOIYAFVLAPIFVGOKLWGLLATYOHSGPROWKPSEVNF→600  
 LTQIAAQGLIALQQAELLNQTQQQAQKLTQALHHLQQTQTQLIQTEKMSSLGQLVAGVAH→660

**All3691(2021 aa), annotated as serine/threonine kinase with two-component sensor domain**

YPQLLQPILQERQFKFNQETI~~AVPGTSSSTLSSTL~~GSTSI~~SDTLD~~FASILKAAQVISTS→1380  
 LELDELITNLTEIILENSGAKKSALLLPQEDIWQIKAMTLSNFQPNSSSESTQTILESQPL→1440  
 ETCEDIPKNI~~IYYVKN~~TQQT~~VVIDNL~~QTDI~~PGLIGEYMLQHQP~~QSVFCTPMMNQGLVGI→1500  
 LYLENRLTRGVFTSDRLEVIRLLSAQAAVSLEKARLYQESQTKAQQLKQLS~~KQQK~~ILFNV→1560  
 VNQMRQSLDLNAIFCVVTONIRRI~~LDVDRVGIYQFHLDVNYEYGEFVAEDVSPAFPSALA~~→1620  
 VKVQ~~DHCF~~GENYANLYKQGRICAITDVOSSEILD~~CH~~ROILAOFHVRASLVVPIMQEEELW→1680  
 GLLCIHQCDRPRQWEPELMOFAQOVGAQMGI~~ALKOTD~~LLIQTQKQATQLEHTLQHLQQTQ→1740

**Alr2279(1299 aa), annotated as two-component hybrid sensor and regulator**

QAEQDLQ~~QQYQHTLLLKQITEEIRQSLQWEKILKTTVTEVORILQVDRALIFQINSDGSG~~→480  
 KVVQEA~~VMPGWSVTLDQDIY~~~~DPCT~~KDGYLNMYRDGRITAIADVYQGGPK~~CY~~VEFLOQFO→540  
 VKANLVVPIRVRNLWGLLIVHOC~~DRPROWTELELDLLKHLADOMGIALTOSOLLAQETR~~→600  
 QAQLLALQNEELNVAKQVAEKANMAKSNFLATMSHEIRTPMNAIIGMSGLLLD~~TTLKPEQ~~→660

**Alr3120(1286 aa), annotated as two-component hybrid sensor and regulator**

RS~~SLSLQ~~TILD~~TVEQVRQLGCDRVNIWYFETEWESIVMAESTTSSTSL~~LGERIE~~ELCF~~→420  
 QQHSAEIYRQGRIRVVPDIYTIEMTD~~CH~~REFLIRLQTRAKILVPLLCGDELWGLLN~~VSES~~→480  
 QHPREWQTEEVELLQGLSVHLAIAIHQATTHQKLQEQ~~LIALQQRSDQLRGSEQRYITLSQ~~→540  
 NLEAKIEERTAE~~LQAREAQLKQTS~~DRLSISLKS~~GAI~~GCWDWDIVENNI~~FWDERMYELYGV~~→600  
 TKTSDSRLVYDTWANRLHPDDRANIEVLVQQAILGQAEYDTEFRVIHPDGSIHFIKAYGV→660  
 VVRDAEGNPQKMIGVHFDISDRKKSEEIIR~~QOVEREKLLREITQRI~~RQSLDLQ~~TIFDIAC~~→720  
 QEICQVIQADRVGIFK~~FYPESNFNDGEFVAESV~~VKEFPSVIAIRVH~~DHCF~~GENYSSLYAL→780  
 GRSYVDDIYHSDMTT~~CH~~TDILAQFHVRANVIMPLLCGAELWGLLCIHQCATTRHWQ~~QSE~~→840  
 IDFTQQLATQLAIAIQQASLVEQLQ~~QELAER~~HQAE~~LKLTQSNQQLAISNQELARATRLK~~D→900

**Alr3356(179 aa), annotated as similar to phytochrome**

MQIHSHAEFD~~PSSNKPTEQGLQKVLQRLVQTMQRDALVRQTTNQLRESLQVDRVVLYFY~~→60

WQWHGQVTFEALSSEEFSSILGSTGAD~~ECT~~NDEYAALYLAGRTKAIADIESEPITTC~~HRDF~~→120  
LRTLQVRANLVVPLVLPKGLWGLLVAHHCQTHDWKESDIELMQAGAKTLATSPYILE~~S~~

**Alr5272(751 aa), annotated as two-component sensor histidine kinase**

STWWS~~T~~TLPLRDTNSKIYRLIGTSSNITAVKQTAQAREIQAEQAQILGAIQRIQESL~~D~~→180  
LETILYQTAKDLRQCLKCDRLIYQIKSDNNGAIVAESTILPNVSLGKHFR~~DPCFTGKY~~→240  
KERQGRCCLEI~~I~~EDIYAAGVKP~~C~~ORDFLASM~~O~~VRANIVVPIALKSDLWGLLIAQYCDEPH→300  
QWQOIEIDLKQLATQLGIAIQNTK~~L~~QQQLKQLQTKLATHKHEQQAQVKQSDKFQALVLD→360  
ITEKTRDYS~~D~~ETQVLATVTQELANLFQLESCYIELYNTDCTAVSVVCEYAAANQPTYQGLT→420  
RQIADFSEIYQPLLQKQHFQ~~T~~IEIVPGWHPQLLVITQLACPIFDAQGMGLGNLWLRPIQQ→480  
MLSQSEICLVQTLANLCAIAIRQAKLDATN~~Q~~ARLKK~~L~~EQRESLTNKFLRKL~~S~~QELRTPIT→540

**Slr1393(975aa), phytochrome-like protein, two-component sensor histidine kinase**

IAEERALTRVIEGIRQTL~~E~~LONIFRATSDEVRHLLSCDRVLVYRFNPDSGFEFIHESVA→480  
QMWEPKDLQNNFPLWQD~~T~~YLOENEGGRYRNHESLAVGDVETAGFTD~~CHLDNLR~~RFEIRA→540  
FLTVPV~~F~~VGEQLWGLL~~G~~AYONGAPRHWOAREIHLHQIANQLGVAVYQAOLLARFQ~~E~~QSK→600

**Tlr0911(1240 aa), annotated as two-component hybrid sensor and regulator**

NQWFAVRVFP~~T~~SRGLAIFCQ~~N~~ITLQVDSSTSLQRRQ~~T~~QAE~~L~~LHRLTIKIR~~R~~SLDLE~~T~~VLK→540  
TAL~~E~~EIRQLLNVDRTLIFQ~~F~~CADGTGEVVAESVAAPPFSLMHR~~T~~FH~~DPCFH~~HRESAEAYVQ→600  
GRVLAIA~~D~~INTATL~~A~~Q~~C~~HRDFLSQLOVRALLAVPIIQEERLWGLFLCHHCSSARPWANDE→660  
VELI~~R~~OLGEOLSFGI~~H~~RAELV~~S~~ALHQ~~E~~KERYRRVLEAQTELLYR~~C~~TPEGHLTFGNPAFFR→720

**B**

**His<sub>6</sub>-tag::All12699 GAF1::HO1::PebS**

MHHHHHHSSGLVPRGSGMKETAAAKFERQHMDSPDLGTD~~DDDDKAMADIGT~~LELEDIIITATTA~~E~~VRALLGTDR  
VMIYKFHPDGSGQVIAESIHENRLP~~S~~LLGLNFPADDIPPQARELLVKS~~K~~VRSIVDVATGMIGQSPVHDLETG  
ELISEDICYRPVDSCHVEY~~L~~TAMGVKSSV~~V~~APIFCQDELWGLLVSHHSENRTVSEDELEAMQMI~~V~~DQLAVAI  
AQSHLLTQARKKAQKEAIGSGSGEFMSSNLANKLRVGT~~K~~KAHTMAENVGFVKCFLKGVAEKSSYRKL~~V~~AN  
FYYVYSAMEEEMEKHSQHP~~I~~VSKINFSQLNRKQ~~T~~LEQDLSYYYGANWREQIQLSPAGEAYVQRI~~R~~EISATEP  
ELLIAHSYTRYLGDLSGGQILKNIAVTAMN~~L~~NDGQGTAFYEFADISDEKAFKAKYRPTLDELAIDEATGDRI  
VDEANA~~A~~AFGMN~~M~~KMFQ~~E~~LEGNLIKAIGMMLFN~~T~~LTRKRTRGATELATAEYPMADIAMTKNPRNNKPKKILDS  
SYKSKTIWQNYIDALFETFPQLEISEVWAKWDGGNVTKDGGDAKLTANIR~~T~~GEHFLKAREAHIVDPNSDIYN  
TILYPKTGADLPCFGMDLMKFS~~D~~KKVIVFDFQHPREKYLFSVDGLPEDDGKYRFFEMGNHFSKNI~~F~~VRYCK  
PDEV~~D~~QYLDTFKLYLTKYKEMIDNNKPVGEDTTVYSDFDTY~~M~~TELDPV~~R~~GYMKNKFGEGRSEAFVND~~F~~LSY  
K

**His<sub>6</sub>-tag::All1280 GAF2::HO1::PebS**

MHHHHHHSSGLVPRGSGMKETAAAKFERQHMDSPDLGTD~~DDDDKAMADIGT~~QSLNLQNILNATVKEIKDLLDV  
DRVVVYQFAPDMSGKIVAESVKPGWKIALGADIQDNC~~F~~QSGAGADYRQGHKRAIANIYTAELTDCHLRLLEQ



FQVKANLVVPIILLEVSEGNTPVQLWGLLIAHQ CSTPRDWEAHELDLLDQLSVPIAIAIQSSILQQAQNELA  
ERQKVEVRLRSALAGSGGSGEFMSSNLANKLRVGTCKKAHTMAENVGFVKCFLKGVAEKSSYRKLVANFYVYVY  
 SAMEEEMEKHSQHPIVSKINFSQLNRKQTLEQDLSYYYGANWREQIQLSPAGEAYVQRIREISATEPELLIA  
 HSYTRYLGDLSGGQILKNIAVTAMNLDGQGTAFYEFADISDEKAFKAKYRPTLDELAIDEATGDRIVDEAN  
 AAFGMNMKMFQELEGNLIKAI GMMLFNTLTRKRTRGATELATAE YPMADIAMTKNPRNNKPKKILDSSYKSK  
 TIWQNYIDALFETFPQLEISEVWAKWDGGNVTKDGGDAKLTANIRTGEHFLKAREAHIVDPNSDIYNTILYP  
 KTGADLPCFGMDLMKFSKDKKVIIVFDFQHPREKYLFSVDGLPEDDGKYRFFEMGNHFSKNIFVRYCKPDEVD  
 QYLDTFKLYLT KYKEMIDNNKPVGEDTTVYSDFD TYMTELPVRYGMKNKFGGRSEAFVNDFLFSYK

**His<sub>6</sub>-tag::Slr1393 GAF3::HO1::PebS**

MGSSHHHHHSSGLVPRGSHMLQNI FRATSDEVRLHLLSCDRVLVYRFNPDWSGEFIHESVAQMWEPLKDLQN  
 NFPLWQD TYLQENEGGRYRNHESLAVGDVETAGFTDCHLDNLRRFEIRAFLTVPVFVGEQLWGLLGAYQNGA  
 PRHWQAREIHLLHQIANQLGVAVYQAQLLARF EQSKTIDLGGGRSRTSGSPGVMSSNLANKLRVGTCKKAHT  
 MAENVGFVKCFLKGVAEKSSYRKLVANFYVYSAMEEEMEKHSQHPIVSKINFSQLNRKQTLEQDLSYYYGA  
 NWREQIQLSPAGEAYVQRIREISATEPELLIAHSYTRYLGDLSGGQILKNIAVTAMNLDGQGTAFYEFADI  
 SDEKAFKAKYRPTLDELAIDEATGDRIVDEANAAFGMNMKMFQELEGNLIKAI GMMLFNTLTRKRTRGATEL  
 ATA E YPMADIAMTKNPRNNKPKKILDSSYKSKTIWQNYIDALFETFPQLEISEVWAKWDGGNVTKDGGDAKL  
 TANIRTGEHFLKAREAHIVDPNSDIYNTILYPKTGADLPCFGMDLMKFSKDKKVIIVFDFQHPREKYLFSVDG  
 LPEDDGKYRFFEMGNHFSKNIFVRYCKPDEVDQYLDTFKLYLT KYKEMIDNNKPVGEDTTVYSDFD TYMTELPVRYGMKNKFGGRSEAFVNDFLFSYK

**Fig. S1: A: Amino acid sequences containing GAF-domains.** The cloned and expressed segments are boxed. The heavily underlined segments could be PEB-chromophorylated, the lightly underlined ones could not. DXCF and like motifs were marked in red, and CH (chromophore binding position) and like motifs in magenta. **B: Amino acid sequences of the fusion proteins.** Black, blue and green characters denote the segments of the original genes, designed linkage and His<sub>6</sub>-tags, respectively.

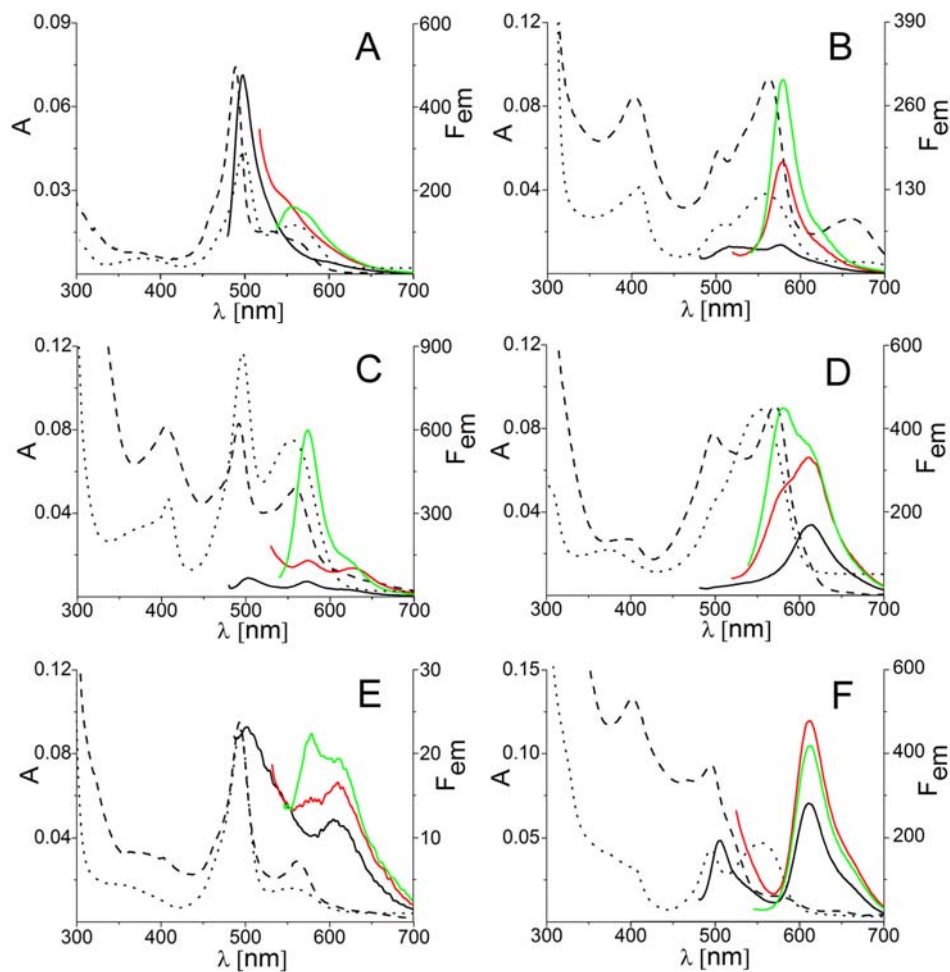

**Fig. S2: Absorption (- - -) and fluorescence emission-spectra (—) of chromophorylated AII3691 GAF2 (A), AII2699 GAF3 (B), Tlr0911 (C), AII3356 (D), AII2279 (E) and AII5272 GAF1 (F).** Samples were reconstituted in *E. coli* (Table S2), purified with Ni<sup>2+</sup> affinity chromatography and then kept in KPB (20 mM, 0.5 M NaCl, pH 7.0). Emission spectra were obtained by excitation at 460 nm (black), 500 nm (red) and 520 nm (green). Denatured absorption spectra (. . .) were done with 8 M urea (pH 2.0) to show the prosthetic chromophore. Spectra of PEB-AII2699 GAF1, PEB-AII1280 GAF2 and PEB-Slr1393 GAF3 are shown in Fig. 1

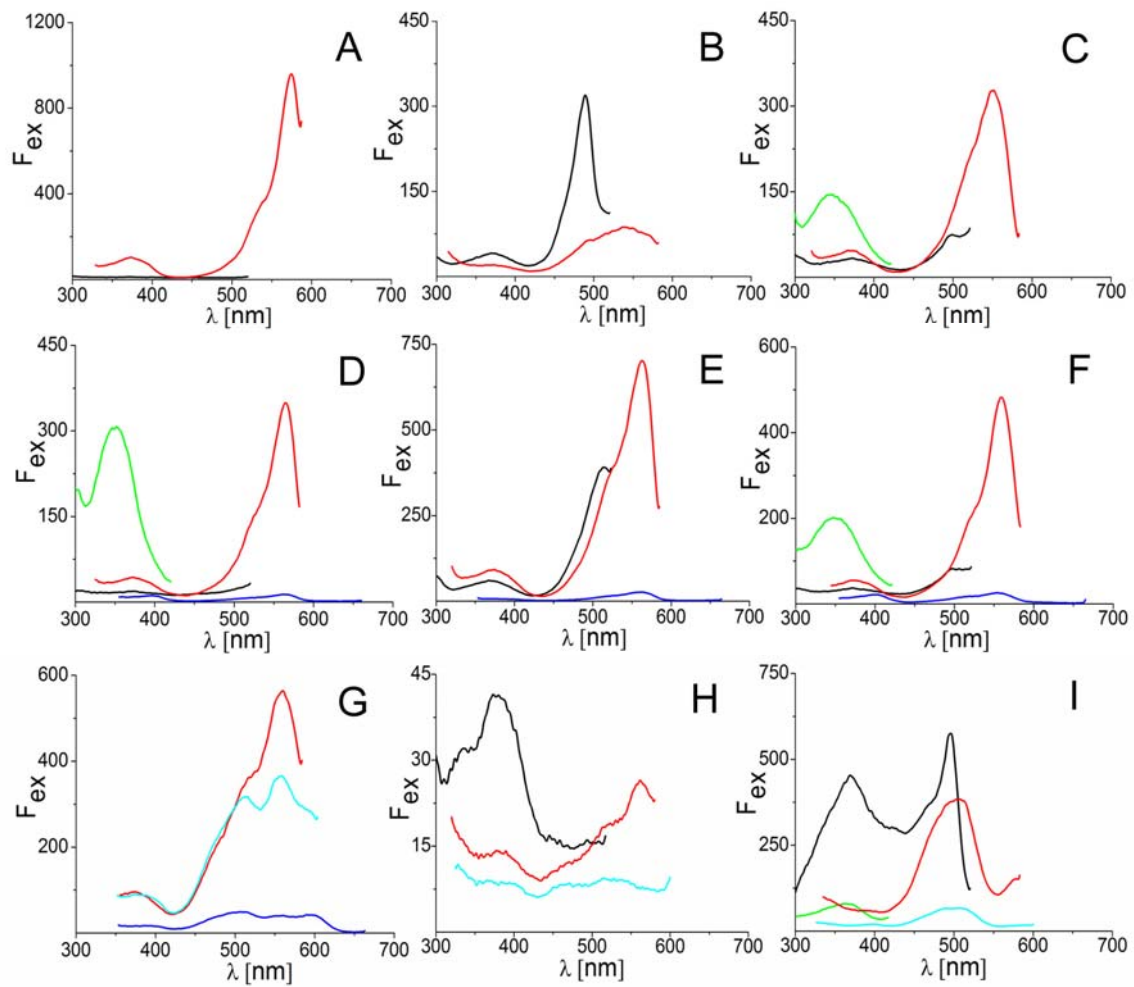

**Fig. S3: Fluorescence excitation-spectra of chromophorylated AII2699 GAF1 (A), AII3691 GAF2 (B), AII1280 GAF2 (C), AII2699 GAF3 (D), Slr1393 GAF3 (E), Tlr0911 (F), Alr3356 (G), Alr2279 (H), and Alr5272 GAF1 (I).** Samples were reconstituted in *E. coli* (Table S2), purified with Ni<sup>2+</sup> affinity chromatography and then kept in KPB (20 mM, 0.5 M NaCl, pH 7.0). Excitation spectra were obtained by monitoring fluorescence at 540 nm (black), 600 nm (red), 440 nm (green), 620 nm (cyan) and 680 nm (blue).

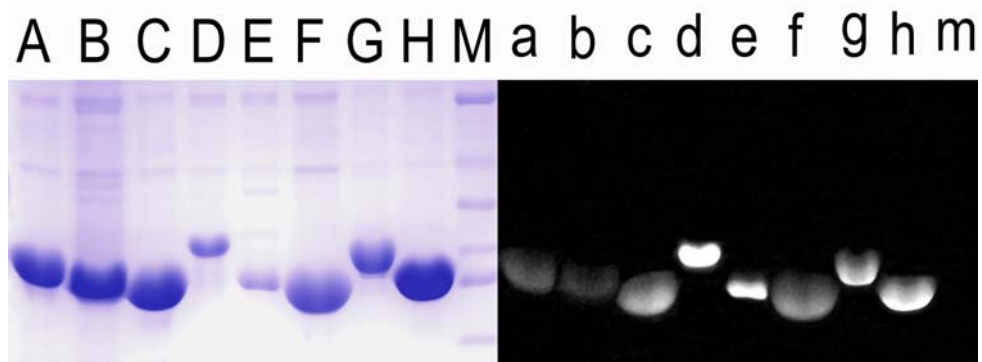

**Fig. S4: SDS-PAGE of PEB-chromophorylated GAFs stained by Coomassie Blue (left panel) and  $Zn^{2+}$  induced fluorescence (right panel). A,a: Alr2279 ; B,b: All2699 GAF3; C,c: Tir0911; D,d: Alr3356; E,e: All3691 GAF2; F,f: All1280 GAF2; G,g: All2699 GAF1; H,h: Slr1393 GAF3; M,m: molecular marker (66, 45, 36, 29, 24, 20 kDa from top to bottom).**

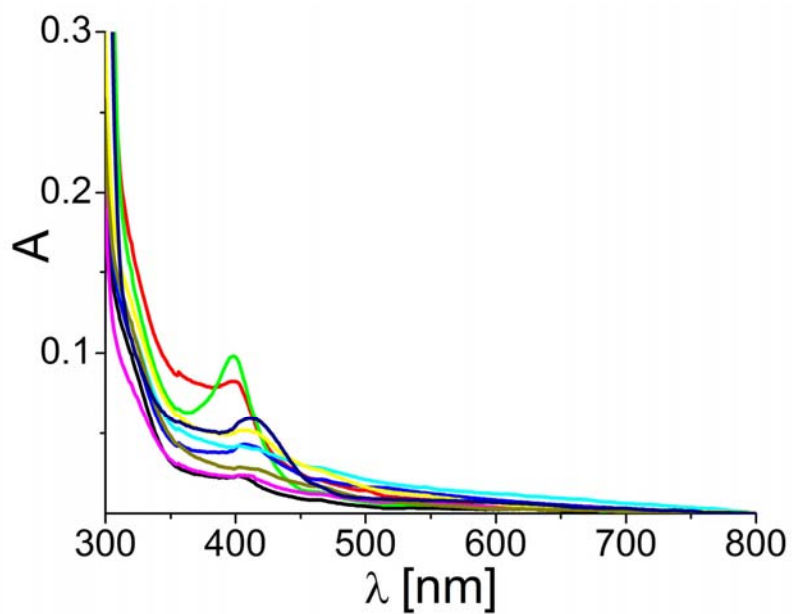

**Fig. S5: Absorptions of nonchromophorylated GAFs.** All3691 GAF1 (black), All0729 GAF1 (red), All0729 GAF2 (green), All0729 GAF3 (blue), Alr3120 GAF1 (cyan), Alr3120 GAF2 (magenta), All1280 GAF1 (yellow), All2239 (dark yellow) and Alr5272 GAF2 (navy); obviously they could not be PEB(PUB)-chromophorylated.

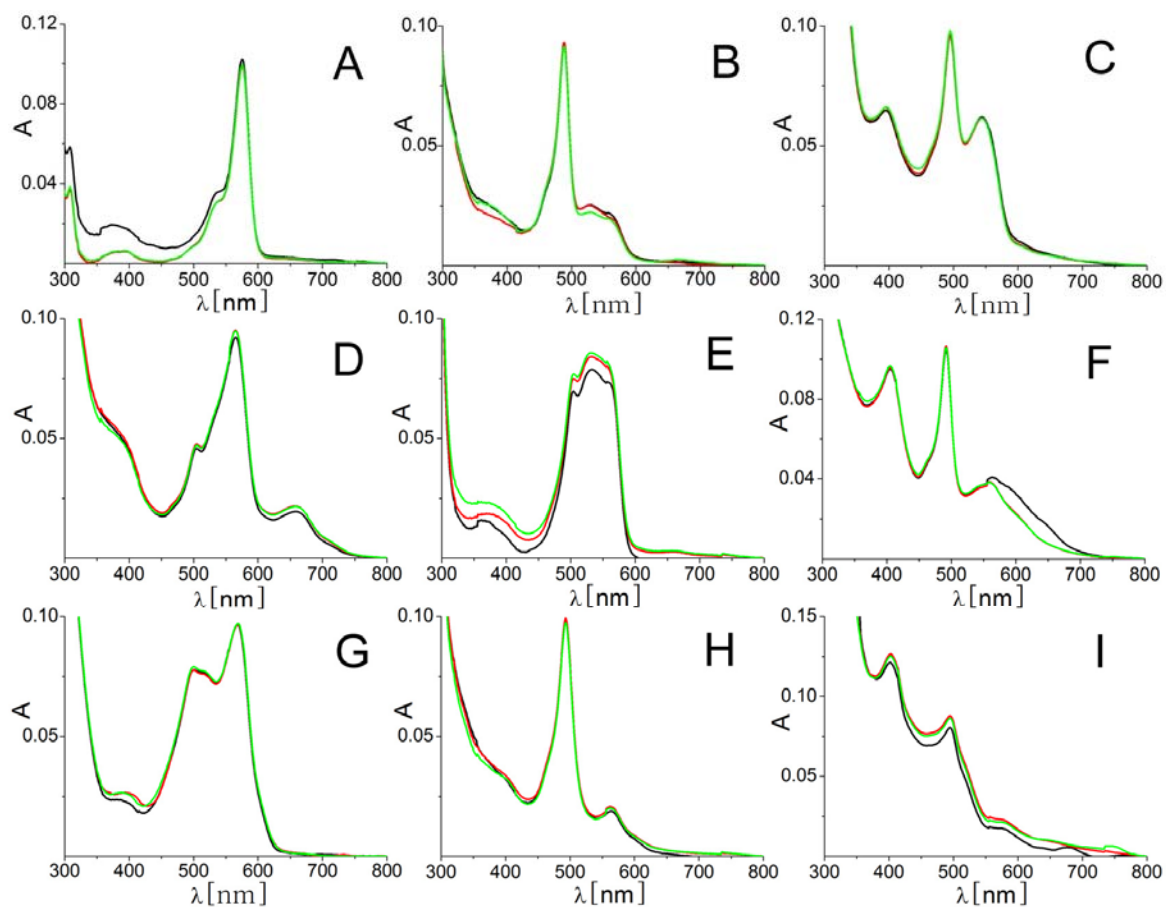

**Fig. S6: Absorption of chromophorylated AII2699 GAF1 (A), AII3691 GAF2 (B), AII1280 GAF2 (C), AII2699 GAF3 (D), Sir1393 GAF3 (E), Tir0911 (F), Alr3356 (G), Alr2279 (H), and Alr5272 GAF1 (I).** The biliproteins showed the same absorption spectra after purification (black) and subsequent irradiation with 500 (red) and 570 (green) nm light; thus they are not photochromic

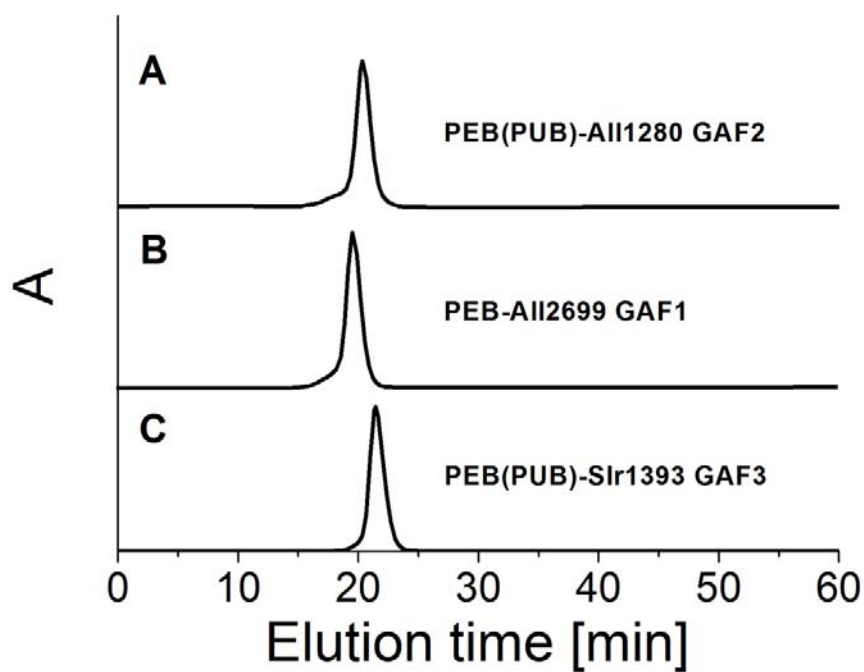

**Fig. S7: Oligomerization of PEB chromophorylated GAFs.** A: PEB(PUB)-AII1280; B: PEB-AII2699; and C: PEB(PUB)-Sir1393 GAF3. The samples were analyzed with gel filtration on a Superdex 75 gel filtration column, developed with KPB buffer. Their peaks eluting at 20.3, 19.7 and 21.4 min correspond to mw of 44.2, 49.2 and 36.8 kDa, corresponding to a dimer (calculated 47.4, 53.1 and 49.6 kDa), respectively.

1. K. Tang, X. L. Zeng, Y. Yang, Z. B. Wang, X. J. Wu, M. Zhou, D. Noy, H. Scheer and K. H. Zhao, *Biochim. Biophys. Acta*, 2012, **1817**, 1030-1036.
